# Supplementary material for: Comprehensive evolutionary, differential expression and VIGS analyses reveal the function of GhNST1 in regulating drought tolerance and early maturity in upland cotton
Source: Research Square preprint supplement (doi:10.21203/rs.3.rs-6974776/v1), 2025-07-14
Supplement: Supplementary file 1 [file 17fcbb3bdcd5cb77a822cb91.xlsx]

## Sheet: Table S1
Table S1: List of information on the nst1 gene in 17 species
Gene name	Gene ID	Latin name of the gene	Group
GrNST1	GLYMA_07G050600	Glycine max	Ⅰ
AhNST1	arahy.Tifrunner.gnm2.ann2.Ah12g052800	Arachis hypogaea	Ⅰ
AhNST2	arahy.Tifrunner.gnm2.ann2.Ah02g046300	Arachis hypogaea	Ⅰ
MtNST1	gene45682	Medicago truncatula	Ⅰ
PsNST1	Psat4g215440	Pisum sativum	Ⅰ
BrNST1	Bra004509	Brassica rapa pekinensis	Ⅱ
BrNST2	Bra003478	Brassica rapa pekinensis	Ⅱ
BrNST3	Bra040486	Brassica rapa pekinensis	Ⅱ
BnNST1	GSBRNA2T00073188001	Brassica napus	Ⅱ
BnNST2	GSBRNA2T00132929001	Brassica napus	Ⅱ
AtNST1	AT2G46770	Arabidopsis thaliana	Ⅱ
TaNST1	TraesCS7A02G317100	Triticum aestivum	Ⅲ
TaNST2	TraesCS6B02G286200	Triticum aestivum	Ⅲ
TaNST3	TraesCS7D02G314000	Triticum aestivum	Ⅲ
OsNST1	OsKeNa_08g0001090	Oryza sativa	Ⅲ
ZmNST1	Zm00001eb260850	Zea mays	Ⅲ
SbNST1	SORBI_3007G018100	Sorghum bicolor	Ⅲ
TcNST1	TCM_005047	Theobroma cacao	Ⅰ
BjNST1	BjuA05g00980S	Brassica juncea	Ⅱ
BjNST2	BjuB08g00670S	Brassica juncea	Ⅱ
GaNST1	Ga11G2997	Gossypium arboretum	Ⅰ
GrNST1	Gorai.007G112500	Gossypium raimondii	Ⅰ
GbNST1	Gobar.D11G110400	Gossypium barbadense	Ⅰ
GbNST2	Gobar.A11G107800	Gossypium barbadense	Ⅰ
GhNST1	GH_D11G1079	Gossypium hirsutum	Ⅰ
GhNST2	GH_A11G1050	Gossypium hirsutum	Ⅰ

## Sheet: Table S2
Table S2: The list of primers used in this study
Name	Primers (5'-3')	Description
qGhNST1Y-FC3A3:C26	TAAGCTCGAGCCCTGGGATA	forward primer for qPCR
qGhNST1Y-R	CTTTCCAAAAGCCAGCAGCC	reverse primer for qPCR
qGhSVP-F	ATTGGGTTGAGCCGTGTGAT	forward primer for qPCR
qGhSVP-R	GGTAACTTGTCTTGGGCCGT	reverse primer for qPCR
qGhSOC1-F	AAGTACGGTCTGTTGCCAGG	forward primer for qPCR
qGhSOC1-R	CTGTTGAGTTGGGTTGCACG	reverse primer for qPCR
qGhFT-F	TGCTCCAAGTCCAAGTGACC	forward primer for qPCR
qGhFT-R	ACGATGGATACCGACCGTTG	reverse primer for qPCR
qGhAP1-F	ATGTGGAGCAGGCACATTGG	forward primer for qPCR
qGhAP1-R	TCATCCATGGCAGCAAGACG	reverse primer for qPCR
qGhDREB2A-F	CAGCGTACATGGGGTAAGTGGG	forward primer for qPCR
qGhDREB2A-R	TTAAGGATCGCTTTGGCACCGT	reverse primer for qPCR
qGhRD29A-F	AACTCCGGCAGAAACCATGGAC	forward primer for qPCR
qGhRD29-R	TCTGCAATAACAGAGGTCGCCG	reverse primer for qPCR
qGhCBL3-F	TGCAGATCGGGTGTTTGACT	forward primer for qPCR
qGhCBL3-R	ACAGAAAGAGCACGAGCGAA	reverse primer for qPCR
GhActin-F	ATCCTCCGTCTTGACCTTG	forward primer for qPCR
GhActin-R	TGTCCGTCAGGCAACTCAT	reverse primer for qPCR
GhNST1-TF	GGAATTCGTGCATGCAACGAAGGAGAG	forward primer forpYL156 -GhNST1 construction
GhNST1-TR	GGGGTACCTCCAGAGGTCCATTTCGCTG	reverse primer forpYL156 -GhNST1 construction
GhNST1-CF	GACTAGTGTGCATGCAACGAAGGAGAG	forward primer for pCLCrVA-GhNST1 construction
GhNST1-CR	AGGCGCGCCTCCAGAGGTCCATTTCGCTG	reverse primer for pCLCrVA-GhNST1 construction
GhNST1-YF	GCGGCTAAGTTGTTGACCGT	Forward primer for the identification of pCLCrV-GhNST1 positive plants
GhNST1-YR	TGCTACAAGCCGGTCAAGTG	reverse primer for the identification of pCLCrV-GhNST1 positive plants
